# Supplementary material
Source: PubMed Central journal article supplement (PMC6267954)
Supplement: NIHMS996602-supplement-Table_S1.pdf [file NIHMS996602-supplement-Table_S1.pdf]

**Supplementary Table 1: DCV induced and dIKK $\beta$ -dependent genes in adult flies**

| No | Probe number | Flybase number | Gene name   | Synonymous                   | Control (Df/+) Fold induction (DCV/Tris) | Mutant (Df/Ird5[1]) Fold induction (DCV/Tris) | Putative function                              |
|----|--------------|----------------|-------------|------------------------------|------------------------------------------|-----------------------------------------------|------------------------------------------------|
| 1  | A_09_P073141 | FBgn0037724    | Fst         | Frost                        | 30.98                                    | 12.86                                         | Unknown                                        |
| 2  | A_09_P218115 | FBgn0039239    | CG13641     |                              | 11.08                                    | 5.38                                          | Unknown                                        |
| 3  | A_09_P007351 | FBgn0261989    | CG42807     |                              | 8.31                                     | 4.14                                          | Unknown                                        |
| 4  | A_09_P015191 | FBgn0052284    | CG32284     |                              | 8.03                                     | 3.64                                          | Chitin binding                                 |
| 5  | A_09_P057711 | FBgn0050121    | CR30121     |                              | 7.58                                     | 1.56                                          | Unknown                                        |
| 6  | A_09_P121665 | FBgn0040735    | CG16836     | DIM-like                     | 7.12                                     | 1.97                                          | Immuno induced DIM-like protein                |
| 7  | A_09_P000201 | FBgn0053532    | lectin-37Da | lectin-37Da                  | 5.97                                     | 1.23                                          | C-type lectin                                  |
| 8  | A_09_P045336 | FBgn0034331    | CG15067     | DIM-like                     | 5.79                                     | 2.08                                          | Immuno induced DIM-like protein                |
| 9  | A_09_P040521 | FBgn0031033    | CG14219     |                              | 4.60                                     | 1.63                                          | Acyltransferase                                |
| 10 | A_09_P015186 | FBgn0052283    | dro3        | Drosomycin-like 3            | 4.37                                     | 0.77                                          | Antimicrobial peptide                          |
| 11 | A_09_P019061 | FBgn0031560    | CG16713     |                              | 4.23                                     | 2.02                                          | Kunitz-type proteinase inhibitor               |
| 12 | A_09_P037556 | FBgn0030262    | Vago        |                              | 3.63                                     | 1.68                                          | Antiviral factor                               |
| 13 | A_09_P018816 | FBgn0031490    | CG17264     |                              | 3.51                                     | 1.61                                          | Unknown                                        |
| 14 | A_09_P074526 | FBgn0038095    | Cyp304a1    | Cyp304a1                     | 3.39                                     | 1.16                                          | Cytochrome P450                                |
| 15 | A_09_P015166 | FBgn0052279    | dro2        | Drosomycin-like 2            | 3.29                                     | 1.25                                          | Antimicrobial peptide                          |
| 16 | A_09_P054616 | FBgn0262007    | CG42825     |                              | 3.18                                     | 0.81                                          | Major facilitator, sugar transporter-like      |
| 17 | A_09_P007136 | FBgn0033792    | CG13325     |                              | 3.13                                     | 1.53                                          | Acyltransferase                                |
| 18 | A_09_P015351 | FBgn0052368    | CG32368     |                              | 3.12                                     | 0.72                                          | Unknown                                        |
| 19 | A_09_P000821 | FBgn0053926    | CG33926     |                              | 3.11                                     | 1.50                                          | Unknown                                        |
| 20 | A_09_P059791 | FBgn0051410    | Npc2e       | Niemann-Pick type C-2e       | 2.93                                     | 1.31                                          | MD-2-related lipid-recognition                 |
| 21 | A_09_P043361 | FBgn0002562    | Lsp1alpha   | Larval serum protein 1 alpha | 2.80                                     | 1.11                                          | Hemocyanin/hexamerin                           |
| 22 | A_09_P018201 | FBgn0031317    | CG5118      |                              | 2.48                                     | 0.88                                          | Ankyrin repeat                                 |
| 23 | A_09_P075931 | FBgn0038451    | CG14893     |                              | 2.17                                     | 1.04                                          | Fatty acyl-CoA reductase                       |
| 24 | A_09_P050506 | FBgn0028855    | CG15282     |                              | 2.09                                     | 0.72                                          | Unknown                                        |
| 25 | A_09_P072481 | FBgn0037562    | CG11671     |                              | 1.92                                     | 0.80                                          | Protein C19orf12 homologue                     |
| 26 | A_09_P005846 | FBgn0033453    | CG1667      |                              | 1.82                                     | 0.72                                          | Stimulator of interferon genes protein (STING) |
| 27 | A_09_P113645 | FBgn0032381    | Mal-B1      | Maltase B1                   | 1.67                                     | 0.82                                          | Glycosyl hydrolase                             |
| 28 | A_09_P042886 | FBgn0001257    | ImpL2       | Ecdysone-inducible gene L2   | 1.66                                     | 0.79                                          | Immunoglobulin subtype                         |
