# Supplementary material
Source: PubMed Central journal article supplement (PMC6267954)
Supplement: NIHMS996602-supplement-Table_S2.pdf [file NIHMS996602-supplement-Table_S2.pdf]

**Supplementary Table 2: dIKK $\beta$ -dependent genes in S2 cells**

| No | Probe Number | Flybase number | Gene name | Synonymous                                          | dsGFP   | ds-dIKK $\beta$ | Ratio (dsdIKK $\beta$ /dsGFP) | Putative function                              |
|----|--------------|----------------|-----------|-----------------------------------------------------|---------|-----------------|-------------------------------|------------------------------------------------|
| 1  | A_09_P050691 | FBgn0034407    | DptB      | Diptericin B                                        | 18 266  | 604             | 0.033                         | Antimicrobial peptide                          |
| 2  | A_09_P014826 | FBgn0052185    | edin      | elevated during infection                           | 19 547  | 746             | 0.038                         | Unknown                                        |
| 3  | A_09_P064286 | FBgn0041581    | AttB      | Attacin-B                                           | 25 796  | 1 298           | 0.050                         | Antimicrobial peptide                          |
| 4  | A_09_P177575 | FBgn0012042    | AttA      | Attacin-A                                           | 7 049   | 512             | 0.073                         | Antimicrobial peptide                          |
| 5  | A_09_P030406 | FBgn0014865    | Mtk       | Metchnikowin                                        | 613     | 51              | 0.083                         | Antimicrobial peptide                          |
| 6  | A_09_P217360 | FBgn0053926    | CG33926   |                                                     | 37 130  | 4 437           | 0.119                         | Unknown                                        |
| 7  | A_09_P219460 | FBgn0000277    | CecA2     | Cecropin A2                                         | 14 357  | 1 762           | 0.123                         | Antimicrobial peptide                          |
| 8  | A_09_P207530 | FBgn0034647    | pirk      | poor Imd response upon knock-in                     | 9 180   | 1 201           | 0.131                         | Negative regulator of the IMD pathway          |
| 9  | A_09_P076236 | FBgn0038530    | AttD      | Attacin-D                                           | 821     | 121             | 0.147                         | Antimicrobial peptide                          |
| 10 | A_09_P027266 | FBgn0034950    | Pask      | PAS kinase                                          | 861     | 128             | 0.149                         | Serine/threonine kinase                        |
| 11 | A_09_P060981 | FBgn0039678    | Obp99a    | Odorant-binding protein 99a                         | 10 453  | 1 689           | 0.162                         | odorant binding                                |
| 12 | A_09_P072481 | FBgn0037562    | CG11671   |                                                     | 19 676  | 3 333           | 0.169                         | Unknown                                        |
| 13 | A_09_P041621 | FBgn0000276    | CecA1     | Cecropin A1                                         | 37 511  | 6 405           | 0.171                         | Antimicrobial peptide                          |
| 14 | A_09_P015351 | FBgn0052368    | CG32368   |                                                     | 148 716 | 26 449          | 0.178                         | Unknown                                        |
| 15 | A_09_P015371 | FBgn0052373    | CG32373   |                                                     | 854     | 154             | 0.181                         | Calcium ion binding                            |
| 16 | A_09_P111805 | FBgn0043578    | PGRP-SB1  | Peptidoglycan recognition protein SB1               | 1 353   | 248             | 0.183                         | Peptidoglycan recognition                      |
| 17 | A_09_P043921 | FBgn0259175    | ome       | omega                                               | 5 766   | 1 180           | 0.205                         | Dipeptidyl-peptidase                           |
| 18 | A_09_P064281 | FBgn0041579    | AttC      | Attacin-C                                           | 442     | 95              | 0.216                         | Antimicrobial peptide                          |
| 19 | A_09_P005846 | FBgn0033453    | CG1667    |                                                     | 33 485  | 7 332           | 0.219                         | Stimulator of interferon genes protein (STING) |
| 20 | A_09_P076706 | FBgn0024222    | ird5      | I-kappaB kinase $\beta$                             | 878     | 200             | 0.227                         | Serine/threonine kinase                        |
| 21 | A_09_P053661 | FBgn0035806    | PGRP-SD   | Peptidoglycan recognition protein SD                | 2 098   | 485             | 0.231                         | Peptidoglycan recognition                      |
| 22 | A_09_P018811 | FBgn0031489    | CG17224   |                                                     | 24 995  | 6 018           | 0.241                         | Uridine phosphorylase                          |
| 23 | A_09_P061131 | FBgn0039714    | Zip99C    | Zinc/iron regulated transporter-related protein 99C | 56 742  | 14 283          | 0.252                         | iron ion transmembrane transporter             |
| 24 | A_09_P018816 | FBgn0031490    | CG17264   |                                                     | 7 368   | 1 891           | 0.257                         | CUB domain                                     |
| 25 | A_09_P012361 | FBgn0010388    | Dro       | Drosocin                                            | 235     | 67              | 0.284                         | Antimicrobial peptide                          |
| 26 | A_09_P079521 | FBgn0027544    | CG2217    |                                                     | 380     | 109             | 0.287                         | Unknown                                        |
| 27 | A_09_P066771 | FBgn0029639    | CG14419   |                                                     | 2 004   | 580             | 0.290                         | Unknown                                        |
| 28 | A_09_P101400 | FBgn0260933    | rempA     | reduced mechanorecept or potential A                | 5 325   | 1 569           | 0.295                         | WD40 repeat                                    |
| 29 | A_09_P020691 | FBgn0032003    | CG8349    |                                                     | 731     | 216             | 0.295                         | cytidine deaminase                             |
| 30 | A_09_P014781 | FBgn0052170    | CG32170   |                                                     | 6 387   | 1 923           | 0.301                         | Unknown                                        |
| 31 | A_09_P183020 | FBgn0003475    | spir      | spire                                               | 3 015   | 935             | 0.310                         | microtubule binding                            |
| 32 | A_09_P059841 | FBgn0051436    | CG31436   |                                                     | 3 510   | 1 113           | 0.317                         | CHK kinase-like                                |
| 33 | A_09_P073846 | FBgn0037906    | PGRP-LB   | Peptidoglycan recognition protein LB                | 191     | 63              | 0.330                         | Peptidoglycan recognition                      |
| 34 | A_09_P075686 | FBgn0038395    | CG10407   |                                                     | 2 359   | 806             | 0.341                         | Haemolymph juvenile hormone binding            |
| 35 | A_09_P026926 | FBgn0034861    | CG9815    |                                                     | 12 101  | 4 139           | 0.342                         | Unknown                                        |
| 36 | A_09_P010311 | FBgn0004240    | DptA      | Diptericin A                                        | 233     | 82              | 0.350                         | Antimicrobial peptide                          |
| 37 | A_09_P018201 | FBgn0031317    | CG5118    |                                                     | 13 080  | 4 634           | 0.354                         | Ankyrin repeat                                 |
| 38 | A_09_P051121 | FBgn0051092    | LpR2      | Lipophorin receptor 2                               | 1 822   | 654             | 0.359                         | lipoprotein particle binding                   |
| 39 | A_09_P071736 | FBgn0039356    | CG5039    |                                                     | 1 295   | 473             | 0.365                         | Unknown                                        |
| 40 | A_09_P071301 | FBgn0039239    | CG13641   |                                                     | 239     | 88              | 0.367                         | Unknown                                        |
| 41 | A_09_P012336 | FBgn0283461    | Drs       | Drosomycin                                          | 7 567   | 2 806           | 0.371                         | Antimicrobial                                  |

|    |              |             |              |                                                   |        |        |       |                                                        |
|----|--------------|-------------|--------------|---------------------------------------------------|--------|--------|-------|--------------------------------------------------------|
|    |              |             |              |                                                   |        |        |       | peptide                                                |
| 42 | A_09_P128140 | FBgn0030310 | PGRP-SA      | Peptidoglycan recognition protein SA              | 43 850 | 16 511 | 0.377 | Peptidoglycan recognition                              |
| 43 | A_09_P148150 | FBgn0038720 | CG6231       |                                                   | 1 086  | 410    | 0.377 | Major facilitator, sugar transporter-like              |
| 44 | A_09_P113990 | FBgn0052040 | CG32040      |                                                   | 1 077  | 407    | 0.378 | Unknown                                                |
| 45 | A_09_P041631 | FBgn0000278 | CecB         | Cecropin B                                        | 5 203  | 1 972  | 0.379 | Antimicrobial peptide                                  |
| 46 | A_09_P215595 | FBgn0034860 | CG9812       |                                                   | 1 100  | 438    | 0.399 | Unknown                                                |
| 47 | A_09_P073841 | FBgn0037902 | CG5281       |                                                   | 3 540  | 1 441  | 0.407 | Unknown, EamA domain                                   |
| 48 | A_09_P048152 | FBgn0045761 | CHKov1       |                                                   | 8 923  | 3 632  | 0.407 | CHK kinase-like                                        |
| 49 | A_09_P073666 | FBgn0037853 | CG14696      |                                                   | 17 524 | 7 141  | 0.407 | Arrestin-like                                          |
| 50 | A_09_P090375 | FBgn0250869 | CG42240      |                                                   | 2 412  | 1 006  | 0.417 | Unknown                                                |
| 51 | A_09_P007351 | FBgn0261989 | CG42807      |                                                   | 2 561  | 1 073  | 0.419 | Unknown                                                |
| 52 | A_09_P030086 | FBgn0014018 | Rel          | Relish                                            | 28 389 | 11 972 | 0.422 | NF-kappa-B with Ankyrin repeat                         |
| 53 | A_09_P197075 | FBgn0033153 | Gadd45       | Growth arrest and DNA damage-inducible 45         | 9 314  | 3 945  | 0.424 | Regulation of cell cycle                               |
| 54 | A_09_P054616 | FBgn0262007 | CG42825      |                                                   | 149    | 64     | 0.427 | Major facilitator, sugar transporter-like              |
| 55 | A_09_P054296 | FBgn0035977 | PGRP-LF      | Peptidoglycan recognition protein LF              | 16 672 | 7 197  | 0.432 | Peptidoglycan recognition                              |
| 56 | A_09_P000682 | FBgn0053801 | His1:CG33801 |                                                   | 36 288 | 15 705 | 0.433 | Chromatin DNA binding, Linker histone H1/H5            |
| 57 | A_09_P166355 | FBgn0039467 | CG14253      |                                                   | 2 938  | 1 288  | 0.438 | Unknown                                                |
| 58 | A_09_P194520 | FBgn0037636 | CG9821       |                                                   | 2 980  | 1 306  | 0.438 | Proline-rich nuclear receptor coactivator              |
| 59 | A_09_P193310 | FBgn0016977 | spen         | split ends                                        | 4 775  | 2 114  | 0.443 | Nucleic acid binding                                   |
| 60 | A_09_P017646 | FBgn0053468 | CG33468      |                                                   | 441    | 195    | 0.443 | Unknown                                                |
| 61 | A_09_P054126 | FBgn0035936 | Tsp66E       | Tetraspanin 66E                                   | 1 631  | 738    | 0.452 | Tetraspanin                                            |
| 62 | A_09_P012906 | FBgn0261822 | Bsg          | Basigin                                           | 7 881  | 3 618  | 0.459 | Immunoglobulin subtype                                 |
| 63 | A_09_P208215 | FBgn0021872 | Xbp1         | X box binding protein-1                           | 4 300  | 1 986  | 0.462 | Transcription factor activity                          |
| 64 | A_09_P114595 | FBgn0010385 | Def          | Defensin                                          | 141    | 65     | 0.462 | Antimicrobial peptide                                  |
| 65 | A_09_P190255 | FBgn0000382 | csw          | corkscrew                                         | 1 692  | 785    | 0.464 | Protein tyrosine phosphatase                           |
| 66 | A_09_P185812 | FBgn0038652 | CG7720       |                                                   | 465    | 216    | 0.465 | Sodium/solute symporter                                |
| 67 | A_09_P168575 | FBgn0265991 | Zasp52       | Z band alternatively spliced PDZ-motif protein 52 | 681    | 319    | 0.468 | Muscle alpha-actinin binding                           |
| 68 | A_09_P064121 | FBgn0041205 | key          | kenny                                             | 24 613 | 11 523 | 0.468 | NF-kappa-B essential modulator NEMO                    |
| 69 | A_09_P154330 | FBgn0003162 | Pu           | Punch                                             | 863    | 405    | 0.469 | GTP cyclohydrolase                                     |
| 70 | A_09_P068396 | FBgn0265413 | CG44325      |                                                   | 755    | 355    | 0.470 | Unknown                                                |
| 71 | A_09_P162750 | FBgn0262582 | cic          | capicua                                           | 7 135  | 3 413  | 0.478 | Repressing transcription factor binding                |
| 72 | A_09_P003781 | FBgn0085359 | CG34330      |                                                   | 36 832 | 17 622 | 0.478 | Unknown                                                |
| 73 | A_09_P047396 | FBgn0011592 | fra          | frazzled                                          | 542    | 262    | 0.483 | Netrin receptor                                        |
| 74 | A_09_P072756 | FBgn0261015 | Pif1A        | PFTAIRE-interacting factor 1A                     | 2 354  | 1 136  | 0.483 | Janus kinase and microtubule-interacting protein       |
| 75 | A_09_P049791 | FBgn0267390 | dop          | drop out                                          | 1 886  | 925    | 0.490 | Microtubule-associated serine/threonine-protein kinase |
| 76 | A_09_P064771 | FBgn0011666 | Msi          | musashi                                           | 372    | 183    | 0.492 | RNA binding                                            |
| 77 | A_09_P050136 | FBgn0029903 | pod1         | pod1                                              | 2 935  | 1 449  | 0.494 | Actin filament binding, WD40 repeat                    |
| 78 | A_09_P019061 | FBgn0031560 | CG16713      |                                                   | 262    | 130    | 0.495 | Proteinase inhibitor Kunitz                            |
| 79 | A_09_P027121 | FBgn0034909 | CG4797       |                                                   | 2 317  | 1 148  | 0.495 | Major facilitator, sugar transporter-like              |
| 80 | A_09_P071931 | FBgn0039413 | CG14556      |                                                   | 270    | 134    | 0.497 | Unknown                                                |

|    |              |             |         |  |        |       |       |                                    |
|----|--------------|-------------|---------|--|--------|-------|-------|------------------------------------|
| 81 | A_09_P005621 | FBgn0033388 | CG8046  |  | 10 214 | 5 083 | 0.498 | Glycerol-3-phosphate dehydrogenase |
| 82 | A_09_P028136 | FBgn0035169 | CG13890 |  | 3 167  | 1 580 | 0.499 | Crotonase superfamily              |
