# Supplementary material
Source: PubMed Central journal article supplement (PMC6267954)
Supplement: NIHMS996602-supplement-Table_S3.pdf [file NIHMS996602-supplement-Table_S3.pdf]

**Supplementary Table 3: LC-MS/MS analysis for a long and short form of dSTING**

| Range     | Sequence                | m/z (1)<br>(measured) | z (2) | #<br>spectra<br>(3) | Mascot<br>score<br>(4) | Rt (5)<br>[min] | Dm/z<br>(6)<br>[ppm] | m/z (1)<br>(measured) | z (2) | #<br>spectra<br>(3) | Mascot<br>score<br>(4) | Rt (5)<br>[min] | Dm/z<br>(6)<br>[ppm] |
|-----------|-------------------------|-----------------------|-------|---------------------|------------------------|-----------------|----------------------|-----------------------|-------|---------------------|------------------------|-----------------|----------------------|
| 2-15      | M.AIASNVVEAGNAVR.A      | 685.8729              | 2     | 11                  | 92.0                   | 19.10           | -0.14                | 685.8730              | 2     | 2                   | 66.3                   | 18.75           | 0.07                 |
| 2-15      | M.*AIASNVVEAGNAVR.A     | 706.8773              | 2     | 4                   | 128.7                  | 24.17           | -1.37                |                       |       |                     |                        |                 |                      |
| 2-18      | M.AIASNVVEAGNAVRAEK.G   | 566.9755              | 3     | 2                   | 83.5                   | 18.98           | -0.83                |                       |       |                     |                        |                 |                      |
| 28 - 38   | K.MIGDYIDTSIR.I         | 642.3198              | 2     | 2                   | 63.6                   | 23.95           | 1.81                 | 642.3180              | 2     | 4                   | 68.5                   | 24.03           | -1.02                |
| 28 - 38   | K.M*IGDYIDTSIR.I        | 650.3156              | 2     | 2                   | 59.1                   | 22.37           | -0.76                | 650.3164              | 2     | 6                   | 71.7                   | 22.60           | 0.47                 |
| 45 - 51   | F.LADLLLR.L             | 407.2714              | 2     | 1                   | 23.8                   | 30.68           | 19.89                |                       |       |                     |                        |                 |                      |
| 55 - 64   | R.C*VVEYGSNGR.Y         | 570.7626              | 2     | 2                   | 50.7                   | 13.42           | 6.75                 | 570.7585              | 2     | 3                   | 61.5                   | 13.62           | -0.43                |
| 65 - 71   | R.YYLPEDRL.L            | 478.2429              | 2     | 2                   | 31.3                   | 17.23           | 27.67                | 478.2336              | 2     | 3                   | 35.6                   | 17.32           | 8.29                 |
| 101 - 108 | R.ISVTGNYSR.N           | 455.2423              | 2     | 4                   | 48.8                   | 14.80           | -1.77                | 455.2428              | 2     | 6                   | 46.1                   | 14.83           | -0.67                |
| 165 - 170 | K.LSLPERK.K             | 357.7099              | 2     | 6                   | 39.1                   | 17.00           | -2.71                | 357.7108              | 2     | 6                   | 40.3                   | 16.77           | -0.11                |
| 165 - 171 | K.LSLPERK.D             | 421.7596              | 2     | 1                   | 31.1                   | 14.53           | 2.96                 | 421.7579              | 2     | 3                   | 31.5                   | 14.87           | -1.17                |
| 179 - 185 | R.LAMYEDK.N             |                       |       |                     |                        |                 |                      | 435.2070              | 2     | 2                   | 34.6                   | 14.28           | -0.70                |
| 179 - 193 | R.LAMYEDKNNVTFGIK.R     |                       |       |                     |                        |                 |                      | 581.6314              | 3     | 3                   | 95.3                   | 23.62           | 0.87                 |
| 179 - 193 | R.LAM*YEDKNNVTFGIK.R    |                       |       |                     |                        |                 |                      | 586.9627              | 3     | 5                   | 129.2                  | 21.28           | 0.17                 |
| 179 - 194 | R.LAMYEDKNNVTFGIK.R.L   |                       |       |                     |                        |                 |                      | 475.4996              | 4     | 2                   | 54.8                   | 23.53           | -1.50                |
| 179 - 194 | R.LAM*YEDKNNVTFGIK.R.L  |                       |       |                     |                        |                 |                      | 479.4986              | 4     | 5                   | 93.8                   | 20.85           | -0.88                |
| 186 - 193 | K.NNVTFGIK.R            |                       |       |                     |                        |                 |                      | 446.7535              | 2     | 1                   | 38.9                   | 18.98           | 12.35                |
| 186 - 194 | K.NNVTFGIK.R.L          |                       |       |                     |                        |                 |                      | 350.2017              | 3     | 2                   | 33.5                   | 16.97           | 0.59                 |
| 217 - 227 | K.AEPLTQFINR.A          | 659.3436              | 2     | 4                   | 82.4                   | 22.05           | 0.11                 | 659.3445              | 2     | 7                   | 67.0                   | 22.03           | 1.43                 |
| 228 - 235 | R.AGYRPFK.H             | 469.2656              | 2     | 2                   | 30.3                   | 15.90           | -1.63                | 469.2651              | 2     | 4                   | 46.3                   | 16.18           | -2.67                |
| 294 - 303 | K.ELITWPETR.D           | 623.3279              | 2     | 1                   | 55.1                   | 23.92           | 0.95                 | 623.3277              | 2     | 4                   | 44.0                   | 24.22           | 0.60                 |
| 304 - 317 | R.DLVLIYNSHDSK.G        | 549.2874              | 3     | 4                   | 80.5                   | 31.77           | 2.71                 | 549.2865              | 3     | 2                   | 57.8                   | 31.75           | 1.07                 |
| 318 - 334 | K.GNLVDVGGELLVAHM*QNK.T |                       |       |                     |                        |                 |                      | 618.3248              | 3     | 4                   | 89.5                   | 30.15           | 0.73                 |

\*: acetylation. \*\*: oxidation. \*\*\*: carbamidomethylation.

**N**: putative N-glycosylation site.

(1) mass-over-charge value from the precursor peptide. (2) charge from the fragmented peptide. (3)

number of peptide-spectrum-matches sharing the same sequence.

(4) score returned by the Mascot search engine. (5) retention time from the sequenced peptide. (6) mass accuracy compared to the theoretical mass-over-charge value.
