# Supplementary material
Source: PubMed Central journal article supplement (PMC6267954)
Supplement: NIHMS996602-supplement-Table_S4.pdf [file NIHMS996602-supplement-Table_S4.pdf]

## Supplementary table 4

### dsRNA primers

| Primer name      | Sequences                                       |
|------------------|-------------------------------------------------|
| dsGFP Fw         | taatacgactcactatagggATGAGTAAAGGAGAAGAAGAACTTTTC |
| dsGFP Rv         | taatacgactcactatagggCATAACCTTCGGGCATGGCACTC     |
| dsAGO2 Fw        | taatacgactcactatagggCGCTACACGATCGAAATCAA        |
| dsAGO2 Rv        | taatacgactcactatagggTATACCCTTGGAGCGCTTTG        |
| dsPGRP-LC (1) Fw | taatacgactcactatagggCCGGAGAAGGAGACCAAAG         |
| dsPGRP-LC (1) Rv | taatacgactcactatagggTCTGGACCGTATAATCCTCCG       |
| dsPGRP-LC (2) Fw | taatacgactcactatagggACCAGGTCACCTACCCGCCAAC      |
| dsPGRP-LC (2) Rv | taatacgactcactatagggGGAGTTGGTCAGGGCGATGCTG      |
| dsPGRP-LE (1) Fw | taatacgactcactatagggGACACTAGGCACTCAAATCGC       |
| dsPGRP-LE (1) Rv | taatacgactcactatagggGAGCGTTATCTCTCGGTGGTG       |
| dsPGRP-LE (2) Fw | taatacgactcactatagggCTTCCTGGTCGGCTGCGATGG       |
| dsPGRP-LE (2) Rv | taatacgactcactatagggGGGCCATGTCTGTATCTCCTCG      |
| dsIMD (1) Fw     | taatacgactcactatagggGGCGGGAAGGAGGCACAGAATC      |
| dsIMD (1) Rv     | taatacgactcactatagggGTTGAAGTTGTAGACGGAGCCG      |
| dsIMD (2) Fw     | taatacgactcactatagggCGCCTCTCCAGACGGTAAGCCGC     |
| dsIMD (2) Rv     | taatacgactcactatagggCTTGCGCTTCTCCAGTGCCTTCC     |
| dsFadd (1) Fw    | taatacgactcactatagggCCTGGAACGAGCGGACGAAC        |
| dsFadd (1) Rv    | taatacgactcactatagggGCTGGGGTGGCATAGTTTTGG       |
| dsFadd (2) Fw    | taatacgactcactatagggCGGATCACAACGAACGATGGTC      |
| dsFadd (2) Rv    | taatacgactcactatagggCTAGTGCGACATTATCTGCTCC      |
| dsDredd (1) Fw   | taatacgactcactatagggGCTTTATGGCGACGACCACTCGG     |
| dsDredd (1) Rv   | taatacgactcactatagggGCACCAACGACAACCTCCTCAC      |
| dsDredd (2) Fw   | taatacgactcactatagggGCAGGAGATCCACTTCGCTTC       |
| dsDredd (2) Rv   | taatacgactcactatagggGATTCCTGCGTTCTCCCGGGTC      |
| dsTak1 (1) Fw    | taatacgactcactatagggATGTGCGACACACGCGCCCTG       |
| dsTak1 (1) Rv    | taatacgactcactatagggCGGGATCCACGTGACGTCCAAC      |
| dsTak1 (2) Fw    | taatacgactcactatagggGAACAGTCACTGGCCGAGATTC      |
| dsTak1 (2) Rv    | taatacgactcactatagggGCAGTCCACAGCCCTCATCCTGC     |
| dsTab2 (1) Fw    | taatacgactcactatagggGCTGTGCTGAGCAATGGAGTG       |
| dsTab2 (1) Rv    | taatacgactcactatagggGGTGACGATAAGGGGACCGCG       |
| dsTab2 (2) Fw    | taatacgactcactatagggAGCAACAGCCACAGCCATTCC       |
| dsTab2 (2) Rv    | taatacgactcactatagggAGCGTCTCCTCCTCCTCATCC       |
| dsIAP2 (1) Fw    | taatacgactcactatagggGCCCCTGAATGCCCCAGTTTCC      |
| dsIAP2 (1) Rv    | taatacgactcactatagggGCTGTCCACTACGCTGTTTCCC      |
| dsIAP2 (2) Fw    | taatacgactcactatagggTGTAAGCGAAGTGCTCGCGAC       |
| dsIAP2 (2) Rv    | taatacgactcactatagggCACAGATGCTGCCTTGCTGGTG      |
| dsKey (1) Fw     | taatacgactcactatagggCACTCGTTTGAGTTCGTACCAG      |
| dsKey (1) Rv     | taatacgactcactatagggCTCCTCTCGCAAATTGCTTCTG      |
| dsKey (2) Fw     | taatacgactcactatagggGGAAACCGTTGCCTCTACG         |
| dsKey (2) Rv     | taatacgactcactatagggCTTCAGGACATCGGATTGAA        |
| dsIrd5 (1) Fw    | ttaatacgactcactatagggACTGGAATGGACGAAAAGGAACTGT  |
| dsIrd5 (1) Rv    | ttaatacgactcactatagggCTTGTTAGCTGATCATAGGCAAAGG  |
| dsIrd5 (2) Fw    | taatacgactcactatagggCAAGCAAAGATTCCGTCCCGC       |
| dsIrd5 (2) Rv    | taatacgactcactatagggCCTCGCCCTCGTTATATAACTTG     |
| dsRelish (1) Fw  | taatacgactcactatagggCGCAAACCTTATCGAGCACAAC      |
| dsRelish (1) Rv  | taatacgactcactatagggACCTGTATCGTCTGGATGGCC       |
| dsRelish (2) Fw  | taatacgactcactatagggCGGCGTTGCTAATGTCACCAG       |
| dsRelish (2) Rv  | taatacgactcactatagggAGGTTTTGGCGTCCGCTTC         |

|                   |                                             |
|-------------------|---------------------------------------------|
| dsAkirin (1) Fw   | taatacgactcactatagggAGACTGGGAGTCGATGAACCAG  |
| dsAkirin (1) Rv   | taatacgactcactatagggCAGCTGTTTGCCTTGTGCAG    |
| dsAkirin (2) Fw   | taatacgactcactatagggCGTCGGCCTTGGAAACGCATGC  |
| dsAkirin (2) Rv   | taatacgactcactatagggTCGTAGCGACGCTGTATCTG    |
| dsCG13641 (1) Fw  | taatacgactcactatagggTGCCTATTACCCACCACGACC   |
| dsCG13641 (1) Rv  | taatacgactcactatagggACTGGGGTATCTGACGGATG    |
| dsCG13641 (2) Fw  | taatacgactcactatagggTGTTGGCTGCGATTCTAGTG    |
| dsCG13641 (2) Rv  | taatacgactcactatagggTAGGCATAGCCACCTGGATG    |
| dsCG42807 (1) Fw  | taatacgactcactatagggGGCACACAGTCAAGATGCAG    |
| dsCG42807 (1) Rv  | taatacgactcactatagggATTGTTTGTCTCCAGGAATCG   |
| dsCG42807 (2) Fw  | taatacgactcactatagggCGGCTGATAATCGCATTAGG    |
| dsCG42807 (2) Rv  | taatacgactcactatagggTGATCAGGACCTCTACACAG    |
| dsCG32368 (1) Fw  | taatacgactcactatagggACACATCGTGCAAAGACAAC    |
| dsCG32368 (1) Rv  | taatacgactcactatagggTGTGCTCCTCGATCATCTTG    |
| dsCG32368 (2) Fw  | taatacgactcactatagggGAAGAACTGGATGAGGAGAACC  |
| dsCG32368 (2) Rv  | taatacgactcactatagggCAAACTGCAAGCAGCTTTGCC   |
| dsCG33926 (1) Fw  | taatacgactcactatagggCCTCCAATATTAGGGCCATAGAG |
| dsCG33926 (1) Rv  | taatacgactcactatagggGAAGGCTCCTCTAGCGTTCC    |
| dsCG33926 (2) Fw  | taatacgactcactatagggGCTGACGGAAAGCTCATTTTTG  |
| dsCG33926 (2) Rv  | taatacgactcactatagggTTCGCAATCCGACTAGCTG     |
| dsCG5118 (1) Fw   | taatacgactcactatagggGAAGGTTCTATTGACCAAAGCCC |
| dsCG5118 (1) Rv   | taatacgactcactatagggCTCGTTTATCGCGTCGATCACCC |
| dsCG5118 (2) Fw   | taatacgactcactatagggGGAGGCAGCGAATCCGAATGAG  |
| dsCG5118 (2) Rv   | taatacgactcactatagggGCGAGCGTATTCGTAGTGATACG |
| dsCG11671 (1) Fw  | taatacgactcactatagggCGAGTAACTCCCCTCCACAG    |
| dsCG11671 (1) Rv  | taatacgactcactatagggTTTATCGTCGGCCAGTATAGC   |
| dsCG11671 (2) Fw  | taatacgactcactatagggGATCAGGGCCATATCCGAAG    |
| dsCG11671 (2) Rv  | taatacgactcactatagggGTTGCAGGCAAATTTCTGTG    |
| dsCG1667 (1) Fw   | taatacgactcactatagggCTCTATTCGCATTGTAGCCA    |
| dsCG1667 (1) Rv   | taatacgactcactatagggCGTACATTGCTAATCGATGTT   |
| dsCG1667 (2) Fw   | taatacgactcactatagggCGGAGACTCGAGACCTTGTAG   |
| dsCG1667 (2) Rv   | taatacgactcactatagggAATATGCCCAAGGGACAACCTG  |
| dsCG16713 (1) Fw  | taatacgactcactatagggCAGTTCAGTTTGCTCTCATCG   |
| dsCG16713 (1) Rv  | taatacgactcactatagggGTTTAGGGAATGGGGTAGAC    |
| dsCG17264 (1) Fw  | taatacgactcactatagggGAAGCGGAGAAAAGCAGTTG    |
| dsCG17264 (1) Rv  | taatacgactcactatagggTCTTTTCACTGGCACTGCAC    |
| dsCG42825 (1) Fw  | taatacgactcactatagggCGCAACCAAAGAACAACC      |
| dsCG42825 (1) Rv  | taatacgactcactatagggGGCAAATACCAGACCATTG     |
| dsCG1667 3'UTR Fw | taatacgactcactatagggGCCAGTTAGCCACACAAACA    |
| dsCG1667 3'UTR Rv | taatacgactcactatagggAGTAAACAAGAGCGCATTACA   |

T7 promoter sequence: taatacgactcactataggg

Fw and Rv indicate Forward and Reverse primer, respectively

### Q-PCR primers

| Primer name | Sequences              |
|-------------|------------------------|
| Rp49 Fw     | GCCGCTTCAAGGGACAGTATCT |
| Rp49 Rv     | AAACGCGGTTCTGCATGAG    |
| DCV Fw      | TCATCGGTATGCACATTGCT   |
| DCV Rv      | CGCATAACCATGCTCTTCTG   |
| CrPV Fw     | GCTGAAACGTTCAACGCATA   |
| CrPV Rv     | CCACTTGCTCCATTTGGTTT   |

|                |                        |
|----------------|------------------------|
| FHV Fw         | TTTAGAGCACATGCGTCCAG   |
| FHV Rv         | CGCTCACTTTCTTCGGGTTA   |
| VSV Fw         | CATGATCCTGCTCTTCGTCA   |
| VSV Rv         | TGCAAGCCCGGTATCTTATC   |
| SINV Fw        | CAAATGTGCCACAGATACCG   |
| SINV Rv        | ATACCCTGCCCTTTCAACAA   |
| IIV6 Fw        | TTGTTAGGAATTGGAAGTGGAA |
| IIV6 Rv        | GCCCTAGATGCTGCTTGTTTC  |
| CecA1 Fw       | ACGCGTTGGTCAGCACACT    |
| CecA1 Rv       | ACATTGGCGGCTTGTTGAG    |
| Att Fw         | GGCCCATGCCAATTTATTC    |
| Att Rv         | AGCAAAGACCTTGGCATCC    |
| CG42807 Fw     | AATGCACCTGAGAGCACCTAC  |
| CG16713 Fw     | ACGCCGATCGAAACGAGTG    |
| CG16713 Rv     | ACACTTGTCTTCACAGATTTC  |
| CG17264 Fw     | TAGGCTGCAAACGGGAACAC   |
| CG17264 Rv     | ACGGGAACAGGGAACAGATG   |
| CG32368 (1) Fw | AAATTGCCAAGGCAAACG     |
| CG32368 (1) Rv | CCGGGATTCATTATTGGAAG   |
| CG32368 (2) Fw | ACACATCGTGCAAAGACAAC   |
| CG32368 (2) Rv | ATTGCCTCTTCTCCTTGTCG   |
| CG33926 Fw     | GCGACCGTCATTGGATTGG    |
| CG33926 Rv     | TGATGGTCCCCTTGATAGCC   |
| CG5118 Fw      | TCTCCAATCACGGTAAACAATG |
| CG5118 Rv      | GAACCTTGGTCGGATCTACTGG |
| CG11671 Fw     | GCTGATCGGAGGACTACTGC   |
| CG11671 Rv     | TTGAAATTTCCCTCCGTAAGTC |
| CG1667 Fw      | CCGGTGTCTATCGTCCTTTC   |
| CG1667 Rv      | CGCTTTAGTTCCTGCATCTG   |
| CG13641 Fw     | GTGTCCATTATCCGCACAAG   |
| CG13641 Rv     | ACTGGGGTATCTGACGGATG   |
| CG42825 Fw     | GCGTTTTGGCCCTTATTATG   |
| CG42825 Rv     | CTTTTGTAGCCGACGCAGTG   |

### Overexpression primers

| Primer name   | Sequences                                   |
|---------------|---------------------------------------------|
| pMT-dSTING Fw | aaagaattcATGGCAATCGCTAGCAACGTTG             |
| pMT-dSTING Rv | aaagcggccgcGTTGGAAATTTTCGT                  |
| pMT-hSTING Fw | aaagaattcATGCCCCACTCCA                      |
| pMT-hSTING Rv | aaagcggccgcAGAGAAATCCGTGCGGA                |
| pMT-Nazo Fw   | gcggaattcgataattcccgccATGGATTCAGCCATCTCAGAG |
| pMT-Nazo Rv   | gcggcggccgcATCAACGATGGTCATTCCCATAC          |
| pMT-CG3740 Fw | gcggaattcgataattcccgccATGCCATAGATACGCGCGAG  |
| pMT-CG3740 Rv | gcggcggccgcGTCCACAATCTGCATGCGCAAC           |
