# Supplementary material
Source: PubMed Central journal article supplement (PMC6267954)

# Supplementary figure 1

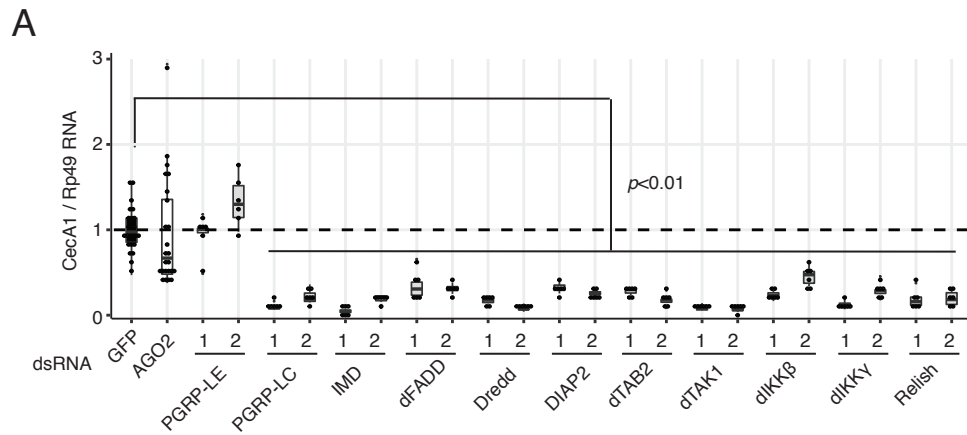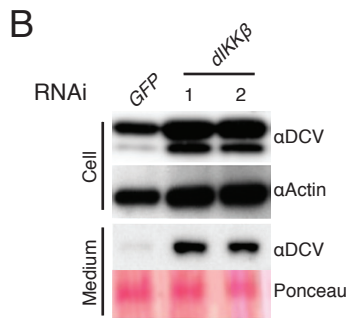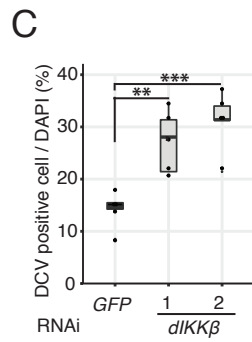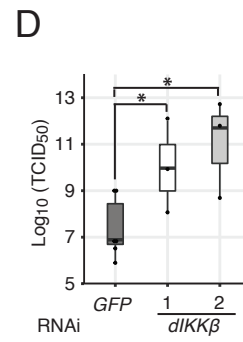

Supplement: NIHMS996602-supplement-Figure_S1.pdf [file NIHMS996602-supplement-Figure_S1.pdf]

# Supplementary figure 2

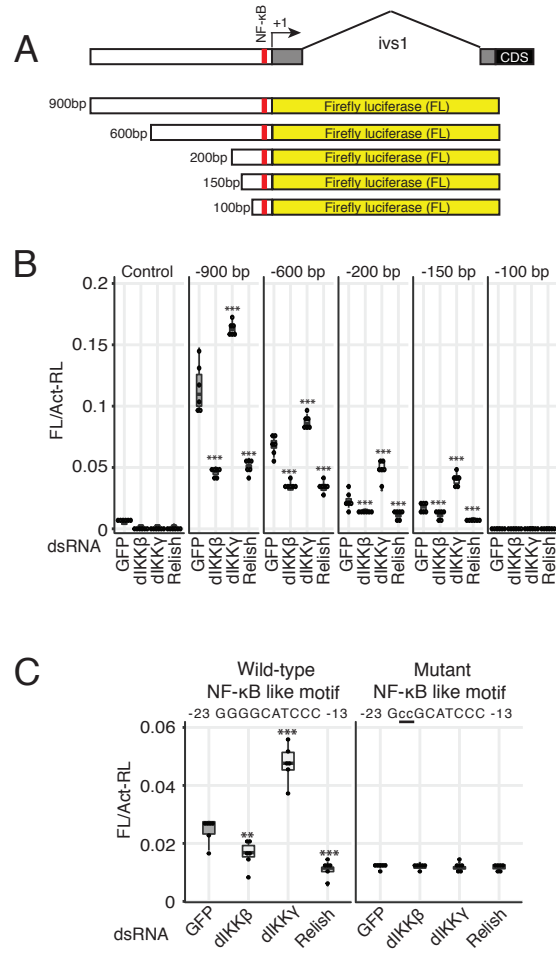

Supplement: NIHMS996602-supplement-Figure_S2.pdf [file NIHMS996602-supplement-Figure_S2.pdf]

# Supplementary figure 3

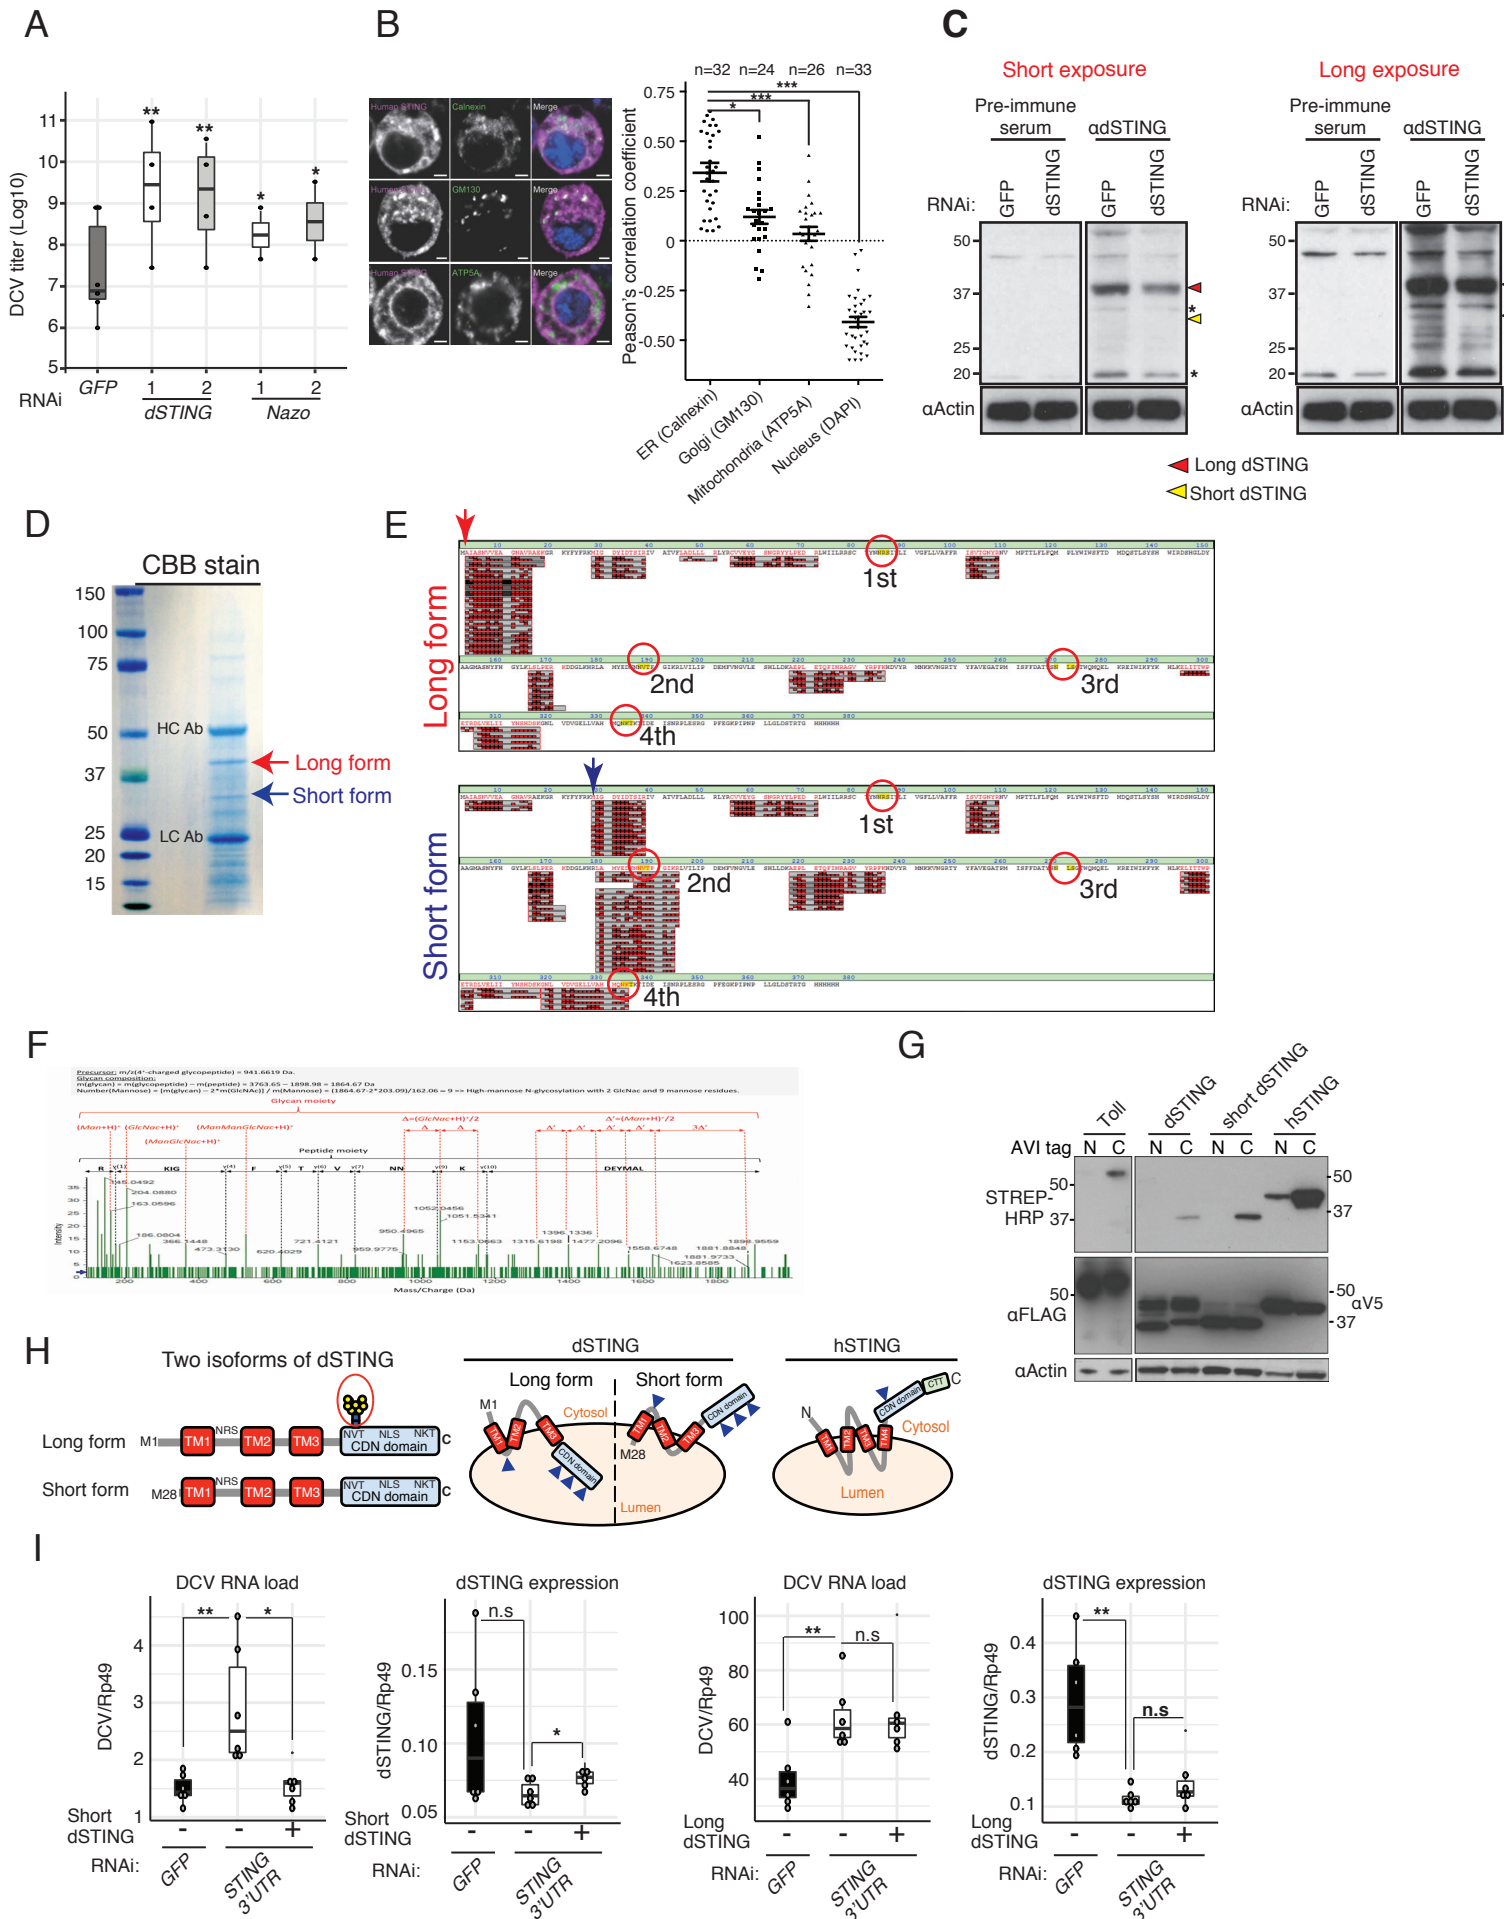

Supplement: NIHMS996602-supplement-Figure_S3.pdf [file NIHMS996602-supplement-Figure_S3.pdf]

# Supplementary figure 4

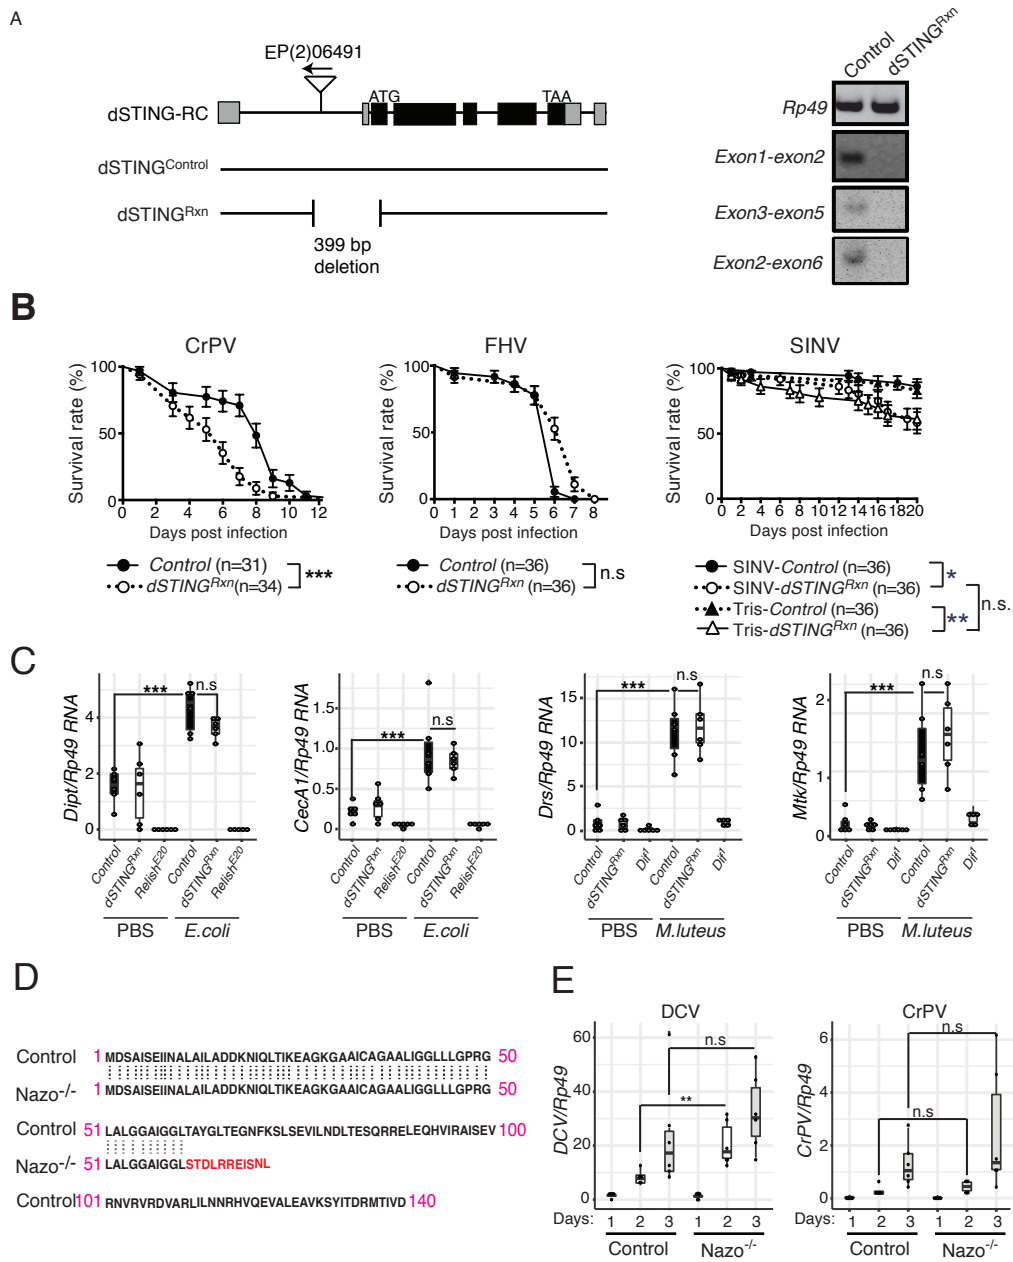

Supplement: NIHMS996602-supplement-Figure_S4.pdf [file NIHMS996602-supplement-Figure_S4.pdf]

# Supplementary figure 5

A

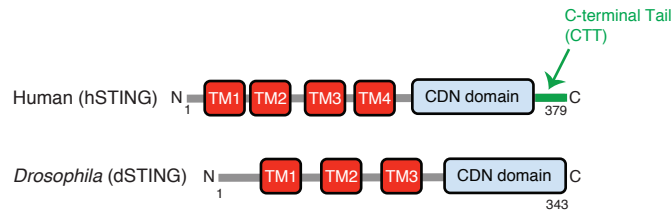

B

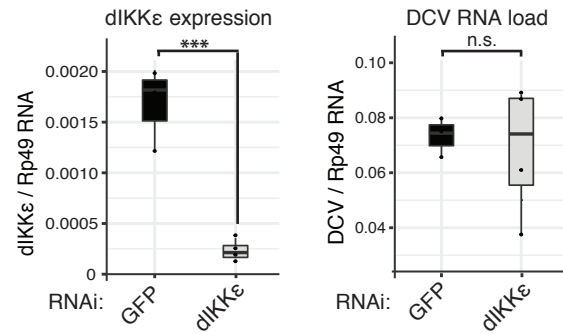

C

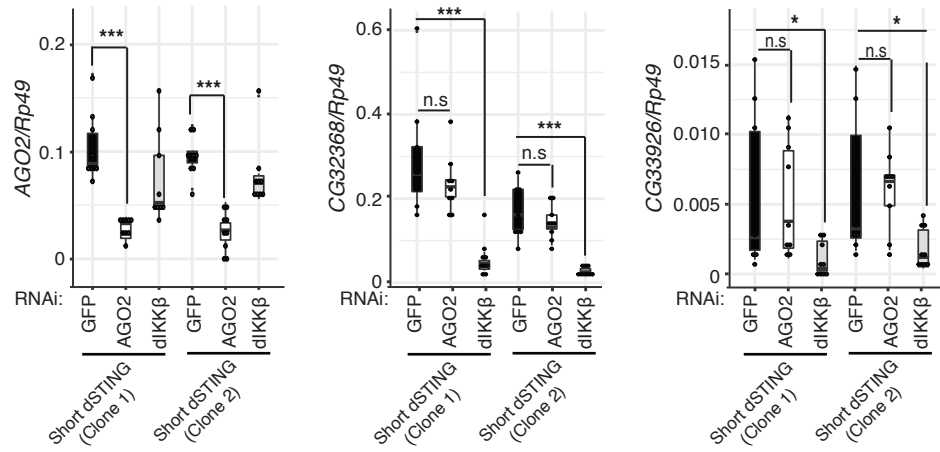

D

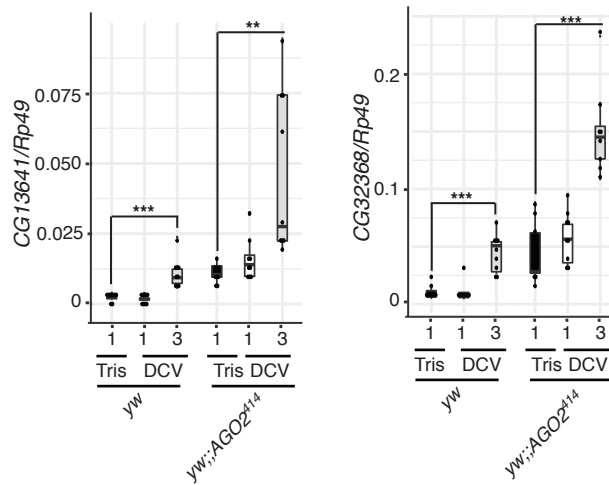

Supplement: NIHMS996602-supplement-Figure_S5.pdf [file NIHMS996602-supplement-Figure_S5.pdf]
